# Supplementary material
Source: PubMed Central journal article supplement (PMC2810080)
Supplement: JCI39843sd.pdf [file JCI39843sd.pdf]

1  
2  
3  
4  
5  
6  
7  
8  
9  
10  
11  
12  
13  
14  
15  
16  
17  
18  
19  
20  
21

**Supplementary Data**

**Supplementary Table 1. Microarray analysis of statin effect on pneumococcal**

**gene expression.** Bacterial RNA was harvested from mid-log phase cultures using Qiagen RNAeasy minikit. Microarray experiments were performed as described previously (1). Briefly, whole-genome *S. pneumoniae* cDNA microarrays were kindly provided from the Pathogen Function Genomics Research Center (PFGRC) at the Institute for Genomic Research (TIGR) consisted of PCR products representing segments of the 2,131 open reading frames of strain TIGR4. Microarray experiments were performed by the Functional Genomics lab, Hartwell Center for Bioinformatics and Biotechnology, St. Jude Children’s Research Hospital using standard protocols provided by PFGRC (<http://pfgrc.tigr.org/protocols.shtml>). Data represents the mean from triplicate experiments using independent RNA samples for genes showing greater than two-fold differences in transcript abundance. If a gene is not listed in the table, there was no significant difference in transcript levels between the control and experimental groups.

22 **Supplementary Table 1**

| <b>TIGR4 with 10 µg/ml simvastatin:</b> |                                                                             |                       |
|-----------------------------------------|-----------------------------------------------------------------------------|-----------------------|
| <b>Down-regulated genes</b>             |                                                                             |                       |
| <b>TIGR4 Name</b>                       | <b>Common Name of Primary Target</b>                                        | <b>Av Fold Change</b> |
| SP0501                                  | transcriptional regulator, MerR family                                      | -2.97                 |
| SP0502                                  | glutamine synthetase, type I                                                | -2.56                 |
| SP0503                                  | hypothetical protein                                                        | -2.15                 |
| SP1648                                  | manganese ABC transporter, ATP-binding protein                              | -3.21                 |
| SP1649                                  | manganese ABC transporter, permease protein, putative, authentic frameshift | -2.32                 |
| SP1650                                  | manganese ABC transporter, manganese-binding adhesion liprotein             | -3.37                 |
|                                         |                                                                             |                       |
| <b>Up-regulated genes</b>               |                                                                             |                       |
| <b>TIGR4 Name</b>                       | <b>Common Name of Primary Target</b>                                        | <b>Av Fold Change</b> |
| SP0916                                  | lysine decarboxylase                                                        | 4.00                  |
| SP0918                                  | spermidine synthase                                                         | 3.15                  |
| SP0919                                  | conserved hypothetical protein                                              | 4.06                  |
| SP0920                                  | carboxynorspermidine decarboxylase                                          | 4.11                  |
| SP0921                                  | conserved hypothetical protein                                              | 3.19                  |
| SP0922                                  | carbon-nitrogen hydrolase family protein                                    | 3.86                  |
| SP1675                                  | ROK family protein                                                          | 3.51                  |
| SP1677                                  | hypothetical protein                                                        | 2.24                  |
| SP1679                                  | hypothetical protein                                                        | 2.99                  |
| SP1680                                  | sugar ABC transporter, permease protein                                     | 2.70                  |
| SP1681                                  | sugar ABC transporter, permease protein                                     | 2.49                  |
| SP1682                                  | sugar ABC transporter, sugar-binding protein                                | 2.42                  |
| SP1686                                  | oxidoreductase, Gfo/Ildh/MocA family                                        | 5.15                  |
| SP1687                                  | neuraminidase B                                                             | 2.46                  |
| SP1688                                  | ABC transporter, permease protein                                           | 2.26                  |
| SP1869                                  | iron-compound ABC transporter, permease protein                             | 4.60                  |
| SP1870                                  | iron-compound ABC transporter, permease protein                             | 6.84                  |
| SP1871                                  | iron-compound ABC transporter, ATP-binding protein                          | 4.44                  |
| SP1872                                  | iron-compound ABC transporter, iron-compound-binding protein                | 6.88                  |
| SP2084                                  | phosphate ABC transporter, phosphate-binding protein                        | 4.18                  |
| SP2085                                  | phosphate ABC transporter, permease protein                                 | 5.17                  |
| SP2086                                  | phosphate ABC transporter, permease protein                                 | 10.36                 |
| SP2087                                  | phosphate ABC transporter, ATP-binding protein                              | 6.49                  |
| SP2088                                  | phosphate transport system regulatory protein PhoU                          | 5.60                  |

23

24

25

26 **Supplementary Figure 1**

27

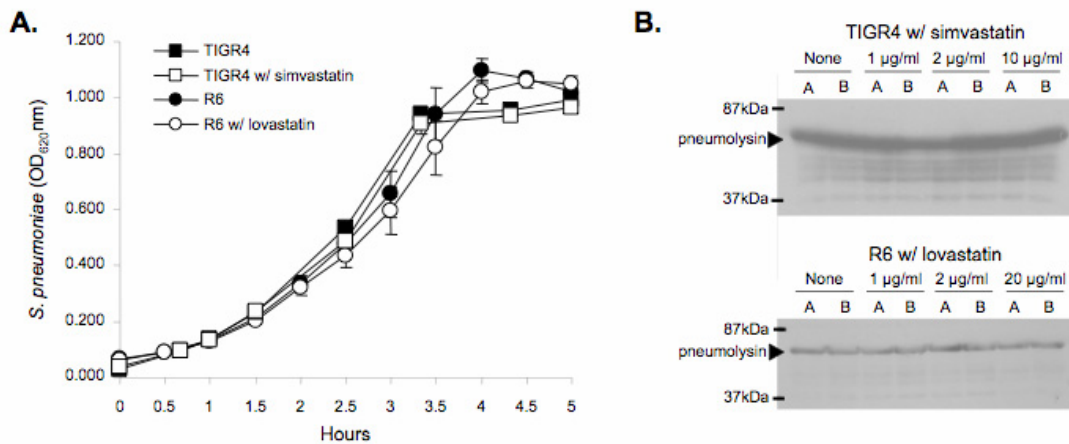

28

29 **Supplementary Figure 1. Lack of effect of simvastatin on pneumococcal growth**  
30 **and toxin secretion. A) Growth of strains TIGR4 and R6 in TH media**  
31 **supplemented with 0, 1, 5, and 10 µM simvastatin or lovastatin was measured by**  
32 **OD<sub>620</sub> over a 6 hour period. B) Pneumococcal strains TIGR4 and R6 were cultured**  
33 **in the presence of increasing concentrations of statins and the supernatant was**  
34 **assayed for pneumolysin production by Western Blot. Lanes A and B represent**  
35 **replicate cultures from independent experiments.**

36

37 **Supplementary Figure 2**

38

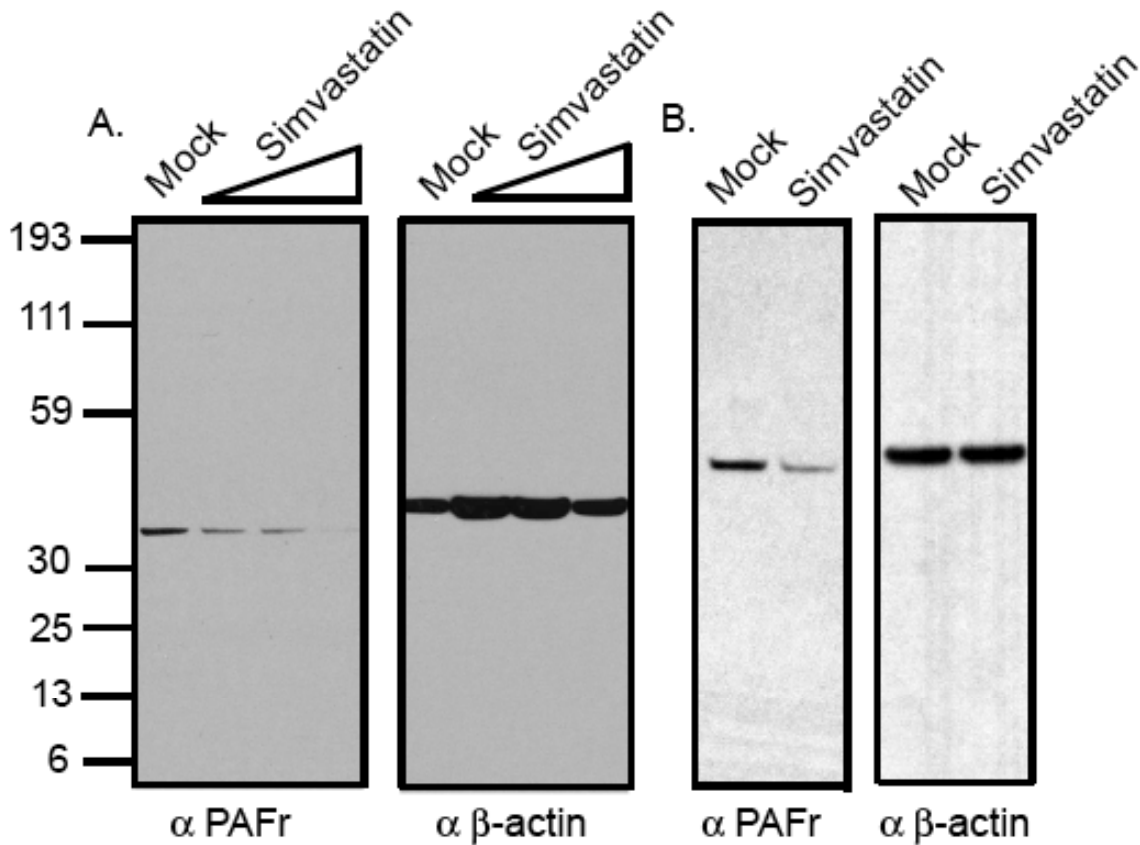

39

40

41 **Supplementary Figure 2. Dose response and kinetics of PAFr expression in**

42 **response to simvastatin. A)** HBMEC were treated overnight with 1uM, 2.5uM, and 10

43 uM simvastatin and PAFr expression was assessed by Western blot.  $\beta$  actin served as

44 the loading control. **B)** PAFr expression assessed by Western blot after 2 hours of 1 $\mu$ M

45 simvastatin showed downregulation of PAFr comparable to Panel A.

46

47

48

49

50

51 References

52

- 53 1. Orihuela, C.J., Radin, J.N., Sublett, J.E., Gao, G., Kaushal, D., and Tuomanen,  
54 E.I. 2004. Microarray analysis of pneumococcal gene expression during invasive  
55 disease. *Infection and Immunity* 72:5582-5596.

56

57
